# Supplementary material for: Toll-Like Receptor Activation by Generalized Modules for Membrane Antigens from Lipid A Mutants of Salmonella enterica Serovars Typhimurium and Enteritidis
Source: PubMed Central journal article supplement (PMC4820502; doi:10.1128/cvi.00023-16), 2016-04-04
Supplement: CVI.00023-16_zcd999095332so1.pdf [file CVI.00023-16_zcd999095332so1.pdf]

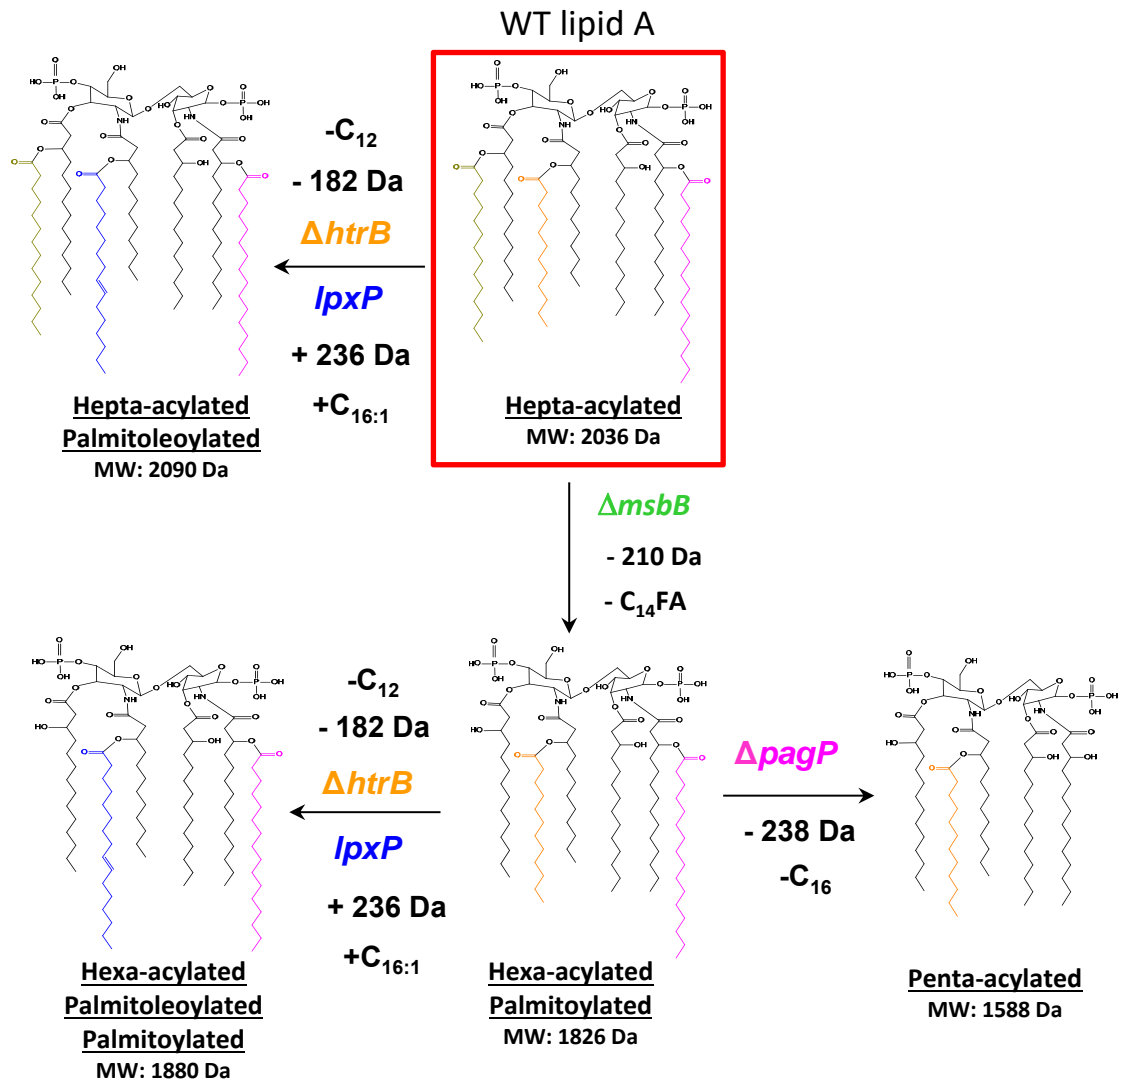

**FIGURE 1S.** Scheme of expected lipid A species in the different mutants, originating from hepta-acylated lipid A.

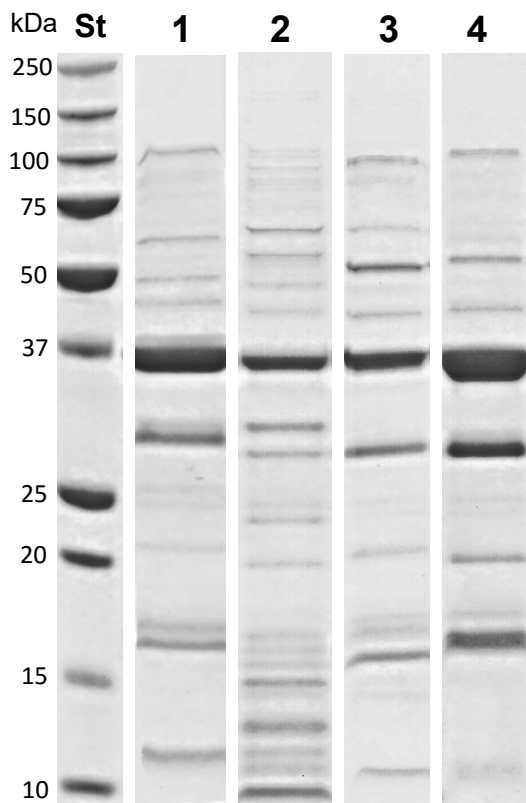

**Figure 2S. SDS-PAGE protein profile of GMMA from *STm<sub>G</sub>ΔmsbBΔpagP* (lane 2) and *SEn<sub>G</sub>ΔmsbBΔpagP* (lane 3).** 10 μg (GMMA protein) were loaded on a 12% SDS-PAGE. For comparison, the protein patterns of GMMA from *STm<sub>G</sub>* (lane 1) and *SEn<sub>G</sub>* (lane 4) without lipid A modification are shown.
